# Supplementary material for: Dipeptide repeat protein inclusions are rare in the spinal cord and almost absent from motor neurons in C9ORF72 mutant amyotrophic lateral sclerosis and are unlikely to cause their degeneration
Source: PubMed Central journal article supplement (PMC4479315; doi:10.1186/s40478-015-0218-y), 2015-06-25
Supplement: 40478_2015_218_MOESM1_ESM.pdf [file 40478_2015_218_MOESM1_ESM.pdf]

Table S1: Quantification of TDP-43 and DPR aggregates in the anterior horn per section, per case

| case            | TDP-43<br>agg. | Poly-GP      |            |              | Poly-GA        |                |                | Poly-GR        |                |                | Poly-PR        |                |                | Poly-PA        |                |                | Diagnosis      |
|-----------------|----------------|--------------|------------|--------------|----------------|----------------|----------------|----------------|----------------|----------------|----------------|----------------|----------------|----------------|----------------|----------------|----------------|
|                 |                | Cyt.         | Nuc.       | Tot.         | Cyt.           | Nuc.           | Tot.           | Cyt.           | Nuc.           | Tot.           | Cyt.           | Nuc.           | Tot.           | Cyt.           | Nuc.           | Tot.           |                |
| 1               | NA             | 0            | 0          | 0            | 0              | 0              | 0              | 0              | 0              | 0              | 0              | 0              | 0              | 0              | 0              | 0              | ALS-TDP        |
| 2               | NA             | 0            | 0          | 0            | 0              | 0              | 0              | 0              | 0              | 0              | 0              | 0              | 0              | 0              | 0              | 0              | ALS-TDP        |
| 3               | NA             | 0            | 0          | 0            | 0              | 0              | 0              | 0              | 0              | 0              | 0              | 0              | 0              | 0              | 0              | 0              | ALS-TDP        |
| 4               | NA             | 0            | 0          | 0            | 0              | 0              | 0              | 0              | 0              | 0              | 0              | 0              | 0              | 0              | 0              | 0              | ALS-TDP        |
| 5               | NA             | 0            | 0          | 0            | 0              | 0              | 0              | 0              | 0              | 0              | 0              | 0              | 0              | 0              | 0              | 0              | ALS-TDP        |
| <b>MEAN±SEM</b> |                |              |            |              |                |                |                |                |                |                |                |                |                |                |                |                | <b>ALS-TDP</b> |
| 6               | 123            | 1            | 0          | 1            | 0              | 0              | 0              | 1              | 0              | 1              | 0              | 0              | 0              | 0.5            | 0              | 0.5            | ALS-C9+ve      |
| 7               | 109            | 0.5          | 0          | 0.5          | 3              | 0.5            | 3.5            | 0              | 0              | 0              | 0              | 0              | 0              | 0              | 0              | 0.0            | ALS-C9+ve      |
| 8               | 171            | 8            | 0          | 8            | 1              | 0              | 1              | 1              | 0              | 1              | 0              | 0              | 0              | 1.0            | 0              | 1.0            | ALS-C9+ve      |
| 9               | 102            | 3            | 0          | 3.3          | 2.3            | 0.3            | 2.7            | 0              | 0              | 0              | 0              | 0              | 0              | 0.7            | 0.3            | 1.0            | ALS-C9+ve      |
| 10              | 107            | 0.3          | 0          | 0.3          | 0.3            | 0.3            | 0.7            | 0.3            | 0              | 0.3            | 0              | 0              | 0              | 0              | 0              | 0.0            | ALS-C9+ve      |
| 11-sacral       | 116            | 2.5          | 0          | 2.5          | 2              | 1.5            | 3.5            | 0              | 0              | 0              | 0              | 0              | 0              | 0.5            | 0              | 0.5            | ALS-C9+ve      |
| 11- cervical    | 80             | 1.5          | 0          | 1.5          | 3              | 1.5            | 4.5            | 0              | 0.5            | 0.5            | 0.5            | 0              | 0.5            | 0              | 0              | 0.0            |                |
| 12-Cervical     | 128            | 1            | 0          | 1            | 4              | 0              | 4              | 2              | 0              | 2              | 0              | 1              | 1              | 0              | 0              | 0.0            | ALS-C9+ve      |
| 12-Lumbar       | 138            | 0            | 0          | 0            | 2              | 0              | 2              | 1              | 0              | 1              | 1              | 0              | 1              | 0              | 0              | 0.0            |                |
| 13-Cervical     | 208            | 1            | 0          | 1            | 2.5            | 0              | 2.5            | 1              | 0              | 1              | 0              | 0              | 0              | 0.5            | 0              | 0.5            | ALS-C9+ve      |
| 13-thoracic     | 136            | 3.5          | 0          | 3.5          | 2.5            | 1.5            | 4              | 1              | 0              | 1              | 0              | 0              | 0              | 0              | 0              | 0.0            |                |
| 13-thoracic     | 112            | 2            | 0          | 2            | 4              | 2              | 6              | 0              | 0              | 0              | 0              | 0.5            | 0.5            | 0              | 0              | 0.0            |                |
| 14-cervical     | 136            | 1            | 0          | 1            | 1              | 0              | 1              | 0              | 0              | 0              | 0              | 0              | 0              | 0              | 0              | 0.0            | ALS-C9+ve      |
| 14-thorathic    | 76             | 2            | 0          | 2            | 1              | 0              | 1              | 0              | 0              | 0              | 0              | 0              | 0              | 0              | 0              | 0.0            |                |
| 14-lumbar       | 96             | 4            | 0          | 4            | 2              | 0              | 2              | 0              | 0              | 0              | 0              | 0              | 0              | 0              | 0              | 0.0            |                |
| 15              | 118            | 0.3          | 0          | 0.3          | 2.7            | 0              | 2.7            | 0              | 0              | 0              | 0              | 0              | 0              | 0              | 0              | 0.0            | ALS-C9+ve      |
| <b>MEAN±SEM</b> | <b>122±8</b>   | <b>2±0.5</b> | <b>0.0</b> | <b>2±0.5</b> | <b>2.1±0.3</b> | <b>0.5±0.2</b> | <b>2.6±0.4</b> | <b>0.5±0.2</b> | <b>0.0±0.1</b> | <b>0.5±0.1</b> | <b>0.1±0.1</b> | <b>0.1±0.1</b> | <b>0.2±0.1</b> | <b>0.2±0.1</b> | <b>0.0±.01</b> | <b>0.2±0.1</b> |                |
