# Supplementary material for: Dipeptide repeat protein inclusions are rare in the spinal cord and almost absent from motor neurons in C9ORF72 mutant amyotrophic lateral sclerosis and are unlikely to cause their degeneration
Source: PubMed Central journal article supplement (PMC4479315; doi:10.1186/s40478-015-0218-y), 2015-06-25

Supplementary Figure 1

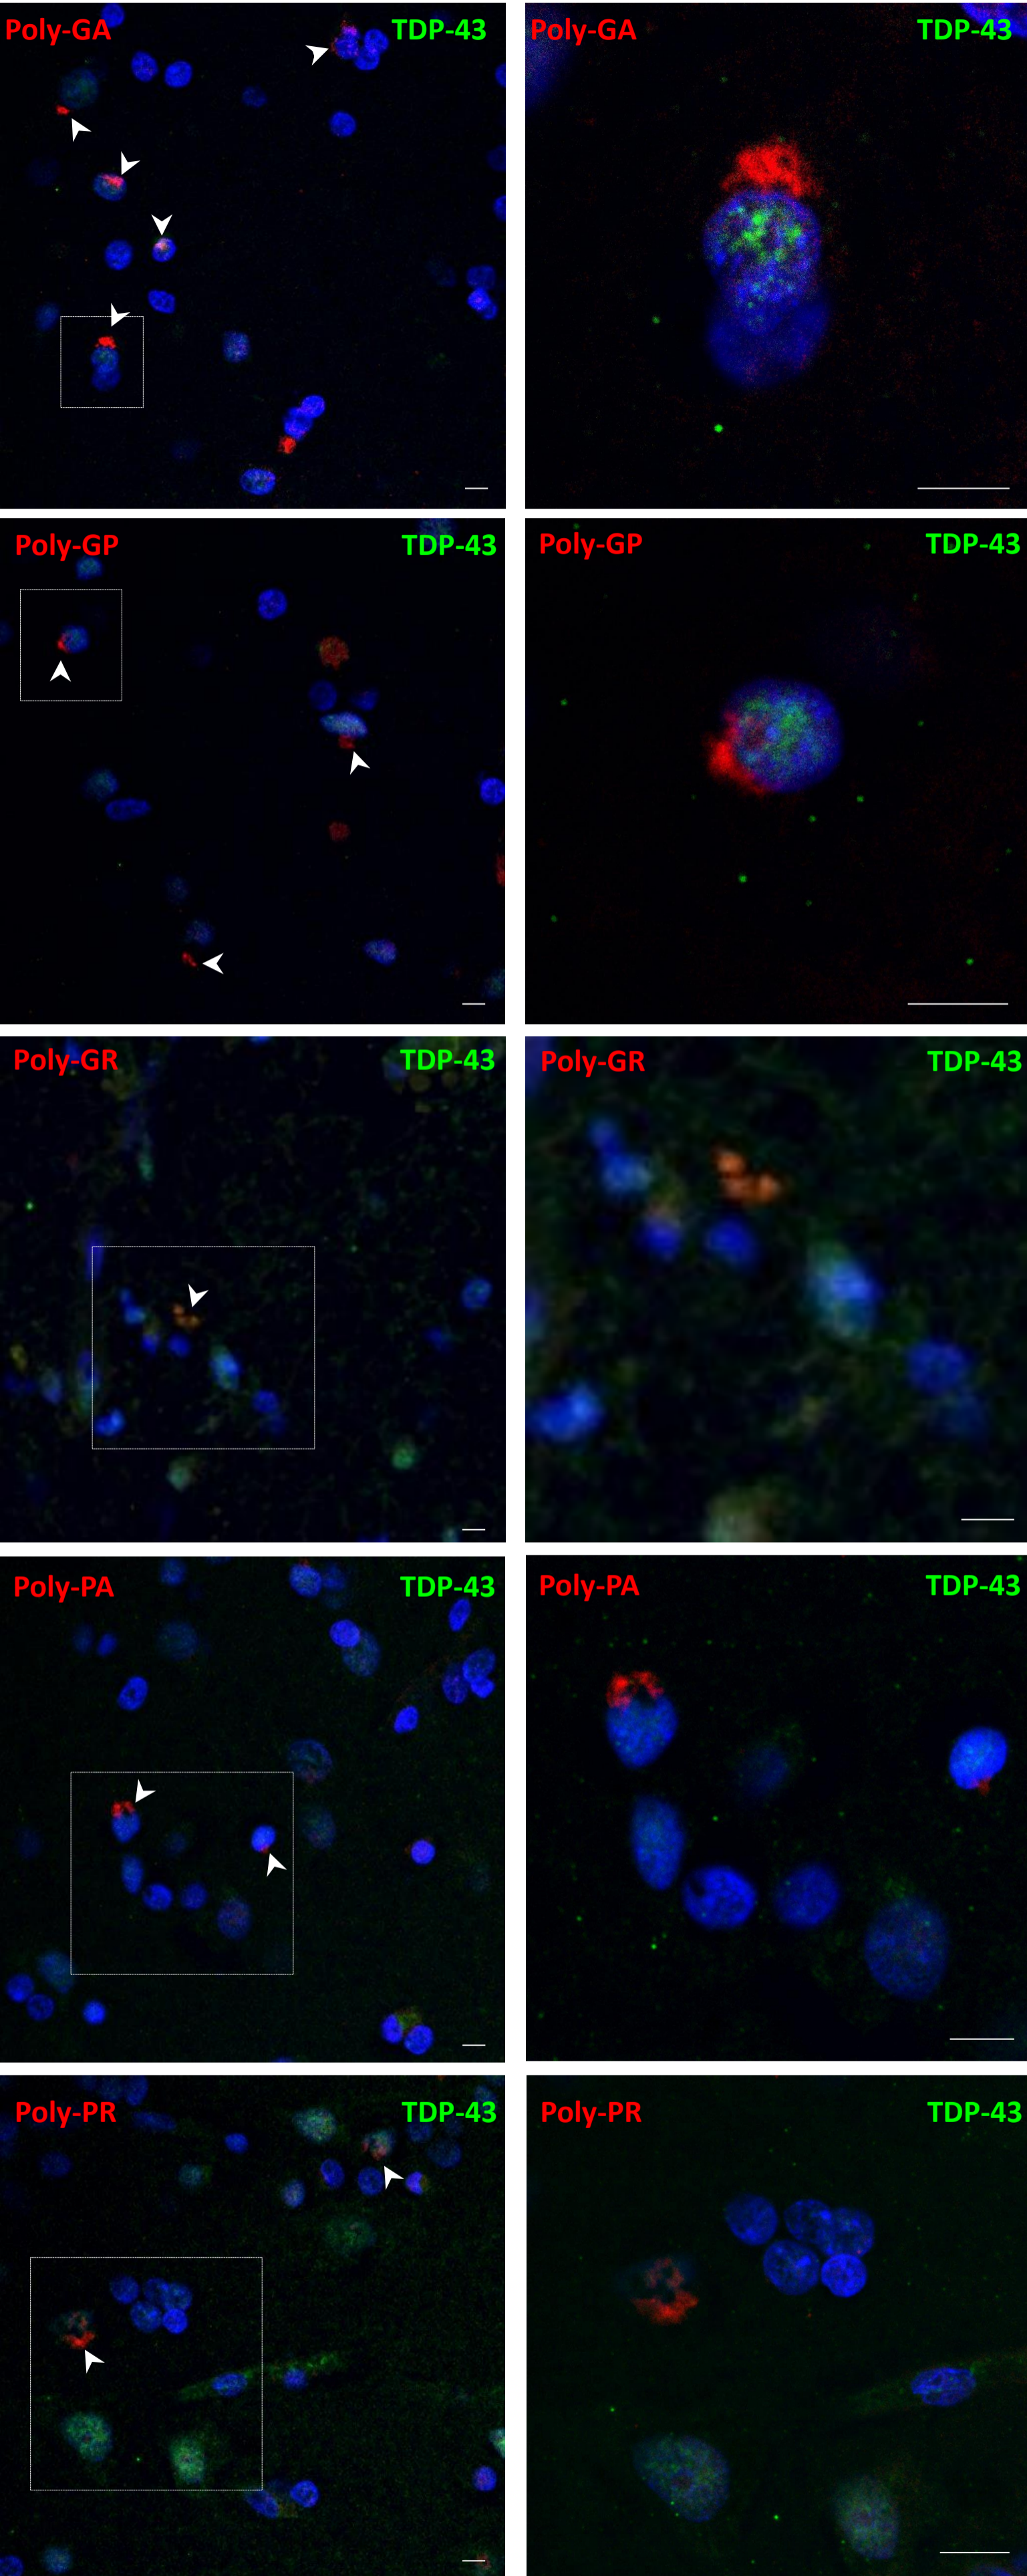

Supplement: 40478_2015_218_MOESM2_ESM.pdf [file 40478_2015_218_MOESM2_ESM.pdf]
